# Supplementary material for: Susceptibility Testing of Colistin for Acinetobacter baumannii: How Far Are We from the Truth?
Source: PubMed Central journal article supplement (PMC7824894; doi:10.3390/antibiotics10010048), 2021-01-05
Supplement: antibiotics-10-00048-s001.pdf [file antibiotics-10-00048-s001.pdf]

Article

# Susceptibility Testing of Colistin for *Acinetobacter baumannii*: How Far are We from the Truth?

Federica Sacco <sup>1,2</sup>, Paolo Visca <sup>3</sup>, Federica Runci <sup>3</sup>, Guido Antonelli <sup>2,4</sup> and Giammarco Raponi <sup>2,5,\*</sup>

<sup>1</sup> Department of Molecular Medicine, University of Rome “La Sapienza”, 00161 Rome, Italy; federica.sacco@uniroma1.it (F.S.)

<sup>2</sup> Clinical Microbiology Laboratory, University Hospital Policlinico Umberto I of Rome, 00185 Rome, Italy; federica.sacco@uniroma1.it (F.S.); guido.antonelli@uniroma1.it (G.A.)

<sup>3</sup> Department of Science, University of Rome “Roma Tre”, 00154 Rome, Italy; paolo.visca@uniroma3.it (P.V.); federica.runci@uniroma3.it (F.R.)

<sup>4</sup> Department of Molecular Medicine, Laboratory of Virology and Pasteur Institute-Cenci Bolognetti Foundation, 00161 Rome, Italy

<sup>5</sup> Department of Public Health Sciences and Infectious Diseases, 00185 Rome, Italy

\* Correspondence: giammarco.raponi@uniroma1.it; Tel.: +39-06-4991-4616.

**Table S1.** Distribution isolates by sample.

| Isolation Sites          | Strains (%) |
|--------------------------|-------------|
| Respiratory samples      | 24 (47.06%) |
| Blood cultures           | 17 (33.33%) |
| Central venous catheters | 3 (5.88%)   |
| Urine                    | 2 (3.92%)   |
| Wound swab               | 2 (3.93%)   |
| Abscess liquid           | 1 (1.96%)   |
| CSF                      | 1 (1.96%)   |
| Nasal swab               | 1 (1.96%)   |

**Table S2.** Distribution of isolates according to infections and colonization.

| Origin of the Strains           | Strains (%) |
|---------------------------------|-------------|
| Bacteraemia                     | 13 (25.48%) |
| Bacteraemia CVC-correlated      | 2 (3.92%)   |
| Ventilator-associated pneumonia | 19 (37.26%) |
| Infections from other sites     | 5 (9.81%)   |
| Respiratory colonization        | 5 (9.81%)   |
| Colonization of the other sites | 7 (13.72%)  |

**Table S3.** Antimicrobial susceptibility profile of *A. baumannii* isolates according to Vitek®2.

| Isolate Id.               | Antimicrobial* |          |          |          |          |          |          |          |             |          |             |          |
|---------------------------|----------------|----------|----------|----------|----------|----------|----------|----------|-------------|----------|-------------|----------|
|                           | A/AA           | P/T      | CTX      | EPM      | IMP      | MEM      | GM       | CIP      | TGC         | FOS      | CST         | T/S      |
| #1                        | R              | R        | R        | R        | R        | R        | R        | R        | R           | R        | S           | R        |
| #2                        | R              | R        | R        | R        | R        | R        | R        | R        | R           | R        | S           | R        |
| #3                        | R              | R        | R        | R        | R        | R        | R        | R        | R           | R        | S           | R        |
| #4                        | R              | R        | R        | R        | R        | R        | R        | R        | R           | R        | S           | R        |
| #5                        | R              | R        | R        | R        | R        | R        | R        | R        | R           | R        | S           | R        |
| #6                        | R              | R        | R        | R        | R        | R        | R        | R        | R           | R        | S           | R        |
| #7                        | R              | R        | R        | R        | R        | R        | R        | R        | R           | R        | S           | R        |
| #8                        | R              | R        | R        | R        | R        | R        | R        | R        | R           | R        | S           | R        |
| #9                        | R              | R        | R        | R        | R        | R        | R        | R        | R           | R        | S           | R        |
| #10                       | R              | R        | R        | R        | R        | R        | R        | R        | R           | R        | S           | R        |
| #11                       | R              | R        | R        | R        | R        | R        | R        | R        | R           | R        | S           | R        |
| #12                       | R              | R        | R        | R        | R        | R        | R        | R        | R           | R        | S           | R        |
| #13                       | R              | R        | R        | R        | R        | R        | R        | R        | R           | R        | S           | R        |
| #14                       | R              | R        | R        | R        | R        | R        | R        | R        | S           | R        | S           | R        |
| #15                       | R              | R        | R        | R        | R        | R        | R        | R        | S           | R        | S           | R        |
| #16                       | R              | R        | R        | R        | R        | R        | R        | R        | R           | R        | S           | R        |
| #17                       | R              | R        | R        | R        | R        | R        | R        | R        | R           | R        | S           | R        |
| #18                       | R              | R        | R        | R        | R        | R        | R        | R        | R           | R        | S           | R        |
| #19                       | R              | R        | R        | R        | R        | R        | R        | R        | R           | R        | S           | R        |
| #20                       | R              | R        | R        | R        | R        | R        | R        | R        | R           | R        | S           | R        |
| #21                       | R              | R        | R        | R        | R        | R        | R        | R        | R           | R        | S           | R        |
| #22                       | R              | R        | R        | R        | R        | R        | R        | R        | R           | R        | S           | R        |
| #23                       | R              | R        | R        | R        | R        | R        | R        | R        | R           | R        | S           | R        |
| #24                       | R              | R        | R        | R        | R        | R        | R        | R        | R           | R        | R           | R        |
| #25                       | R              | R        | R        | R        | R        | R        | R        | R        | R           | R        | S           | R        |
| #26                       | R              | R        | R        | R        | R        | R        | R        | R        | R           | R        | S           | R        |
| #27                       | R              | R        | R        | R        | R        | R        | R        | R        | R           | R        | R           | R        |
| #28                       | R              | R        | R        | R        | R        | R        | R        | R        | R           | R        | S           | R        |
| #29                       | R              | R        | R        | R        | R        | R        | R        | R        | R           | R        | S           | R        |
| #30                       | R              | R        | R        | R        | R        | R        | R        | R        | R           | R        | S           | R        |
| #31                       | R              | R        | R        | R        | R        | R        | R        | R        | S           | R        | S           | R        |
| #32                       | R              | R        | R        | R        | R        | R        | R        | R        | R           | R        | S           | R        |
| #33                       | R              | R        | R        | R        | R        | R        | R        | R        | R           | R        | S           | R        |
| #34                       | R              | R        | R        | R        | R        | R        | R        | R        | R           | R        | R           | R        |
| #35                       | R              | R        | R        | R        | R        | R        | R        | R        | R           | R        | R           | R        |
| #36                       | R              | R        | R        | R        | R        | R        | R        | R        | S           | R        | S           | R        |
| #37                       | R              | R        | R        | R        | R        | R        | R        | R        | S           | R        | S           | R        |
| #38                       | R              | R        | R        | R        | R        | R        | R        | R        | R           | R        | S           | R        |
| #39                       | R              | R        | R        | R        | R        | R        | R        | R        | R           | R        | S           | R        |
| #40                       | R              | R        | R        | R        | R        | R        | R        | R        | R           | R        | S           | R        |
| #41                       | R              | R        | R        | R        | R        | R        | R        | R        | R           | R        | S           | R        |
| #42                       | R              | R        | R        | R        | R        | R        | R        | R        | R           | R        | S           | R        |
| #43                       | R              | R        | R        | R        | R        | R        | R        | R        | R           | R        | S           | R        |
| #44                       | R              | R        | R        | R        | R        | R        | R        | R        | R           | R        | S           | R        |
| #45                       | R              | R        | R        | R        | R        | R        | R        | R        | R           | R        | S           | R        |
| #46                       | R              | R        | R        | R        | R        | R        | R        | R        | R           | R        | S           | R        |
| #47                       | R              | R        | R        | R        | R        | R        | R        | R        | S           | R        | S           | R        |
| #48                       | R              | R        | R        | R        | R        | R        | R        | R        | R           | R        | R           | R        |
| #49                       | R              | R        | R        | R        | R        | R        | R        | R        | R           | R        | S           | R        |
| #50                       | R              | R        | R        | R        | R        | R        | R        | R        | S           | R        | S           | R        |
| #51                       | R              | R        | R        | R        | R        | R        | R        | R        | R           | R        | R           | R        |
| <b>Susceptibility (%)</b> | <b>0</b>       | <b>0</b> | <b>0</b> | <b>0</b> | <b>0</b> | <b>0</b> | <b>0</b> | <b>0</b> | <b>13.7</b> | <b>0</b> | <b>88.2</b> | <b>0</b> |

\*Abbreviations are according to the Vitek®2 nomenclature: A/AA, amoxicillin/clavulanic acid; P/T, piperacillin/tazobactam; CTX, cefotaxime; EPM, ertapenem; IMP, imipenem; MEM, meropenem; GM, gentamicin; CIP, ciprofloxacin; TGC, tigecycline; FOS, fosfomycin; CST, colistin; T/S, trimethoprim/sulfamethoxazole. Grey-filled boxes denote susceptibility.

Table S4. MICs for colistin determined by MIC Test Strip, Vitek®2 and broth microdilution.

| Isolate Id. | MIC [ $\mu\text{g/mL}$ ]* |             |                     |
|-------------|---------------------------|-------------|---------------------|
|             | Test Strip                | VITEK®2     | Broth Microdilution |
| #1          | 1.50                      | 2           | 1                   |
| #2          | 3                         | 2           | 1                   |
| #3          | 4                         | 2           | 8                   |
| #4          | 2                         | 2           | 1                   |
| #5          | 2                         | $\leq 0.50$ | 0.50                |
| #6          | 6                         | 2           | 4                   |
| #7          | 8                         | 2           | 8                   |
| #8          | 0.75                      | $\leq 0.50$ | <0.12               |
| #9          | 4                         | $\leq 0.50$ | 0.50                |
| #10         | 1.5                       | $\leq 0.50$ | 0.50                |
| #11         | 0.75                      | $\leq 0.50$ | 0.50                |
| #12         | 0.50                      | $\leq 0.50$ | <0.50               |
| #13         | 1                         | $\leq 0.50$ | <0.12               |
| #14         | 0.50                      | $\leq 0.50$ | 0.50                |
| #15         | 1                         | $\leq 0.50$ | 1                   |
| #16         | 1.50                      | $\leq 0.50$ | 1                   |
| #17         | 0.75                      | $\leq 0.50$ | 0.50                |
| #18         | 0.75                      | $\leq 0.50$ | 0.50                |
| #19         | 1                         | $\leq 0.50$ | 0.50                |
| #20         | 0.75                      | $\leq 0.50$ | 0.50                |
| #21         | 0.75                      | $\leq 0.50$ | 0.25                |
| #22         | 0.50                      | $\leq 0.50$ | 0.50                |
| #23         | 2                         | $\leq 0.50$ | 0.50                |
| #24         | 4                         | 16          | >8                  |
| #25         | 16                        | $\leq 0.50$ | >8                  |
| #26         | 0.50                      | $\leq 0.50$ | 0.50                |
| #27         | 1                         | 8           | 4                   |
| #28         | 12                        | 2           | 8                   |
| #29         | 3                         | 2           | 1                   |
| #30         | 1.50                      | $\leq 0.50$ | 0.50                |
| #31         | 1.50                      | $\leq 0.50$ | 1                   |
| #32         | 1.50                      | $\leq 0.50$ | 1                   |
| #33         | 1.50                      | $\leq 0.50$ | 1                   |
| #34         | 8                         | 4           | 4                   |
| #35         | 16                        | 8           | 8                   |
| #36         | 0.75                      | $\leq 0.50$ | 0.50                |
| #37         | 1.50                      | $\leq 0.50$ | 0.50                |
| #38         | 3                         | $\leq 0.50$ | 0.50                |
| #39         | 0.75                      | $\leq 0.50$ | 0.50                |
| #40         | 0.75                      | $\leq 0.50$ | 0.50                |
| #41         | 2                         | $\leq 0.50$ | 1                   |
| #42         | 1                         | 1           | 1                   |
| #43         | 0.75                      | $\leq 0.50$ | 0.50                |
| #44         | 2                         | $\leq 0.50$ | 0.50                |
| #45         | 2                         | $\leq 0.50$ | 1                   |
| #46         | 4                         | $\leq 0.50$ | 8                   |
| #47         | 0.75                      | $\leq 0.50$ | 1                   |
| #48         | 6                         | 4           | >8                  |
| #49         | 3                         | $\leq 0.50$ | 0.50                |
| #50         | 3                         | $\leq 0.50$ | 0.50                |
| #51         | 16                        | 8           | >8                  |

\*Resistance values are grey shaded; discordant MIC values are in bold.
